# Supplementary material for: Age-Related Differences in Functional and Structural Connectivity in the Spatial Navigation Brain Network
Source: Front Neural Circuits. 2019 Oct 29;13:69. doi: 10.3389/fncir.2019.00069 (PMC6828843; doi:10.3389/fncir.2019.00069)
Supplement: Supplementary file 1 [file Table_1.XLSX]

## Sheet: MNI
Table SI-1: Peak coordinates for scene-selective (PPA, RSC, OPA) and low-visual regions (CVF, PVF) obtained from functional localizers (CVF: central visual field, PVF: peripheral visual field, PPA: parahippocampal place area, OPA: occipital place area, RSC: retrosplenial cortex)
	CVF						PVF						PPA						OPA						RSC
	Right			Left			Right			Left			Right			Left			Right			Left			Right			Left
	x	y	z	x	y	z	x	y	z	x	y	z	x	y	z	x	y	z	x	y	z	x	y	z	x	y	z	x	y	z
JOC001	33	-90	-3	-22	-97	-5	23	-86	28	-14	-97	18	28	-48	-8	-25	-49	-8	36	-82	32	-32	-82	32	20	-57	25	-14	-60	18
PAE002	28	-94	-12	-22	-95	-12	16	-92	8	-7	-97	8	26	-48	-9	-22	-45	-10	28	-85	33	-32	-84	28	18	-55	18	-17	-57	10
GRB003	33	-90	-8	-32	-87	-12	19	-92	18	-17	-94	12	28	-44	-8	-22	-40	-14	33	-80	25	-37	-77	28	20	-50	12	-17	-54	15
LEJ004	26	-96	-5	-24	-97	-5	16	-97	18	-20	-94	20	26	-40	-10	-22	-44	-6	33	-77	28	-34	-80	22	23	-54	25	-15	-57	25
YOE005	28	-95	-8	-27	-92	-10	23	-95	20	-22	-97	15	30	-42	-8	-22	-45	-8	33	-87	25	-30	-87	28	18	-54	12	-20	-60	18
VAE006	33	-90	5	-32	-87	2	15	-92	22	-17	-94	22	23	-47	-10	-22	-42	-8	20	-85	26	-27	-82	31	18	-52	15	-17	-57	22
EHC007	26	-97	-2	-30	-94	0	14	-94	20	-10	-97	20	30	-40	-10	-24	-42	-10	36	-74	20	-30	-80	25	23	-54	20	-22	-57	13
POE008	28	-92	-8	-27	-90	-12	23	-92	18	-14	-97	8	28	-50	-8	-22	-40	-8	38	-82	18	-37	-80	22	18	-52	15	-14	-57	15
PEL009	28	-94	-5	-22	-97	0	18	-92	22	-15	-97	20	26	-44	-8	-27	-47	-5	38	-80	18	-34	-87	18	20	-54	22	-17	-55	13
BAN010	28	-94	-8	-22	-97	-12	13	-92	20	-20	-94	15	28	-40	-12	-24	-42	-8	40	-78	15	-40	-85	14	18	-52	15	-12	-52	10
CHM011	33	-90	-10	-27	-92	-12	14	-94	15	-15	-94	15	28	-47	-8	-22	-40	-8	36	-82	28	-34	-84	28	16	-50	18	-22	-62	15
BUD012	25	-94	-10	-32	-90	-10	13	-97	12	-14	-97	15	26	-50	-12	-24	-40	-12	36	-77	28	-34	-80	25	16	-57	20	-12	-57	15
FOD013	26	-97	0	-24	-97	2	10	-92	17	-10	-94	22	26	-52	-8	-22	-44	-5	36	-82	25	-34	-82	28	18	-50	12	-20	-54	22
SOD015	33	-90	-5	-30	-90	-8	26	-86	22	-22	-92	20	26	-50	-5	-27	-47	-5	38	-77	20	-32	-82	20	20	-50	20	-20	-54	20
BAA016	26	-87	-15	-22	-87	-15	20	-94	15	-20	-95	12	28	-47	-10	-27	-49	-12	33	-80	32	-32	-82	33	20	-52	12	-17	-57	15
BEH017	26	-94	-10	-27	-97	-5	13	-94	12	-7	-94	8	28	-42	-5	-24	-45	-8	38	-80	20	-37	-80	22	20	-54	22	-17	-57	22
LEM019	30	-88	-5	-27	-92	-5	18	-92	22	-15	-94	22	28	-40	-8	-27	-44	-8	36	-77	28	-34	-84	22	23	-54	20	-22	-58	18
BAA020	33	-92	2	-25	-97	-2	13	-92	15	-10	-92	8	28	-44	-5	-27	-47	-5	38	-80	25	-38	-82	18	20	-52	20	-15	-52	13
PEJ021	28	-90	-12	-24	-92	-15	16	-94	22	-20	-97	8	23	-40	-8	-24	-42	-8	37	-77	28	-30	-87	28	16	-54	12	-17	-57	10
POV022	28	-92	-8	-27	-94	-7	19	-93	19	-17	-97	15	26	-40	-12	-24	-40	-8	38	-80	27	-37	-80	22	20	-54	15	-17	-57	17
JAF023	25	-94	2	-22	-97	2	15	-94	17	-14	-90	22	26	-40	-10	-27	-45	-8	36	-77	28	-32	-80	25	18	-54	20	-16	-57	15
BAA027	33	-90	-10	-32	-95	-5	15	-94	20	-12	-97	20	23	-42	-10	-27	-42	-10	33	-82	30	-37	-80	28	17	-52	12	-17	-52	10
COS028	20	-87	-7	-27	-90	-15	16	-97	22	-20	-97	12	26	-47	-10	-27	-49	-6	36	-79	30	-32	-87	30	18	-52	15	-15	-57	15
GOP030	30	-97	-5	-30	-95	-7	16	-92	15	-17	-95	18	30	-42	-8	-27	-47	-8	33	-82	25	-34	-82	28	22	-52	15	-20	-54	12
POE031	30	-92	-10	-30	-90	-10	23	-86	18	-22	-87	22	25	-44	-8	-22	-47	-8	33	-78	20	-32	-80	22	16	-52	12	-15	-54	12
CHF036	30	-92	0	-28	-94	0	16	-94	17	-15	-95	20	28	-47	-8	-24	-47	-10	36	-80	30	-37	-82	28	16	-50	12	-19	-56	17
BEC038	26	-97	0	-24	-97	-2	16	-90	18	-19	-90	15	28	-40	-10	-27	-40	-10	36	-80	22	-34	-82	22	18	-50	18	-14	-54	15
BRC040	28	-92	-3	-22	-94	-8	15	-90	22	-14	-94	18	28	-40	-12	-29	-40	-12	38	-77	20	-32	-77	20	21	-54	18	-20	-57	18
ATA041	23	-97	-5	-22	-97	-2	13	-90	15	-12	-94	15	28	-44	-10	-27	-40	-12	36	-84	28	-34	-81	30	20	-52	15	-18	-56	17
ROM042	20	-97	-2	-22	-94	-8	13	-95	18	-12	-97	16	28	-40	-12	-24	-42	-10	36	-82	20	-32	-84	25	22	-52	18	-17	-52	18
ATM043	25	-92	-5	-20	-94	-8	20	-94	18	-19	-92	18	26	-40	-10	-24	-40	-10	30	-82	32	-32	-84	28	16	-50	18	-17	-54	13
POP044	30	-92	-5	-30	-90	-3	18	-90	22	-20	-90	20	28	-45	-8	-27	-47	-8	30	-79	26	-30	-80	28	18	-50	13	-17	-54	15
EUA045	28	-92	-10	-25	-97	-8	16	-94	18	-17	-97	20	28	-44	-12	-25	-42	-10	34	-81	30	-30	-84	28	20	-52	15	-17	-54	13
AYF046	24	-97	-2	-27	-94	0	16	-92	20	-18	-90	21	28	-40	-8	-29	-40	-10	36	-80	30	-34	-80	28	20	-57	20	-17	-57	22
DEX047	33	-92	0	-32	-94	-5	16	-94	15	-14	-97	18	28	-42	-8	-24	-42	-7	38	-80	25	-36	-80	25	16	-54	12	-12	-55	15
MAM048	26	-97	-2	-23	-97	2	13	-97	18	-12	-94	18	28	-42	-5	-27	-47	-7	33	-80	32	-34	-82	32	23	-59	25	-20	-57	22
DIG049	28	-97	2	-27	-95	0	16	-94	22	-12	-95	20	26	-46	-5	-25	-49	-7	33	-82	28	-30	-84	28	16	-52	15	-15	-52	15
BOP052	28	-92	0	-27	-92	-2	15	-92	18	-14	-94	18	28	-44	-8	-27	-42	-8	36	-80	25	-34	-82	30	20	-57	22	-17	-57	22
BOP054	28	-94	0	-24	-97	-2	16	-97	15	-15	-95	15	26	-44	-8	-24	-47	-8	35	-82	20	-32	-84	20	23	-53	18	-20	-57	18
MEAN	28.0513	-92.9744	-4.84615	-26.1282	-93.6923	-5.74359	16.5641	-92.7692	18.2821	-15.4872	-94.4615	16.641	27.0769	-43.7949	-8.76923	-24.9487	-43.8205	-8.53846	34.8462	-80.2308	25.6923	-33.4103	-82.1026	25.6154	19.1026	-52.9487	17	-17.1026	-55.8205	16.1538
SD	3.41782	2.96903	4.69344	3.57019	3.16356	5.18458	3.47013	2.77642	3.62701	3.98597	2.55308	4.40387	1.70733	3.51073	2.04504	2.17581	3.16121	2.12561	3.53582	2.6304	4.66315	2.74071	2.51097	4.41657	2.2918	2.29357	4.01969	2.64371	2.32687	3.87664
